# Supplementary material
Source: ML conference proceedings conference paper supplement (https://proceedings.neurips.cc/paper_files/paper/2013/hash/fc8001f834f6a5f0561080d134d53d29-Abstract.html)
Supplement: Supplementary file [file fc8001f834f6a5f0561080d134d53d29-Supplemental.zip]

---

# Learning to Prune in Metric and Non-Metric Spaces (supplemental material)

---

**Leonid Boytsov**

Carnegie Mellon University

Pittsburgh, PA, USA

srchvrs@cmu.edu

**Bilegsaikhan Naidan**

Norwegian University of Science and Technology

Trondheim, Norway

bileg@idi.ntnu.no

## 1 Introduction

This short note supplements the paper “Learning to Prune in Metric and Non-Metric Spaces” [3]. We aim to provide a theoretical justification for applicability of our approach (the VP-tree with a learned pruner) to a class of non-metric spaces, which includes the KL-divergence and the Itakura-Saito distance. In addition, we describe a simple algorithm to learn the decision function through sampling.

## 2 Applicability Conditions

**Theorem 1.** *For any pivot  $\pi$ , probability  $\alpha$ , and distance  $x \neq R$ , there exists a radius  $r > 0$  such that, if two randomly selected points  $q$  (a potential query) and  $u$  (a potential nearest neighbor) satisfy  $d(\pi, q) = x$  and  $d(u, q) \leq r$ , then both  $p$  and  $q$  belong to the same partition (defined by  $\pi$  and  $R$ ) with a probability at least  $\alpha$ .*

Theorem 1, which is true for all metric spaces, holds in the case of KL-divergence and data points  $u$  sampled randomly and uniformly from the simplex  $\{x_i | x_i \geq 0, \sum x_i = 1\}$ .

**Note 1.** *This theorem is trivially extended to many other non-negative distance functions  $d(x, y)$  that satisfy:*

- $d(x, y) \geq 0$  and  $d(x, y) = 0 \Leftrightarrow x = y$ ;
- $d(x, y)$  is continuous except for a set of measure zero;

In particular, the theorem holds for the Itakura-Saito distance. Note, though, that these conditions are not *sufficient*, because one may need to make additional compactness requirements. For the example, the proof for the KL-divergence relies on the fact that the distance is defined on the compact Euclidean subset.

*Proof.* It is easy to show that for any  $\alpha$  there exists  $\epsilon > 0$  such that all coordinates of the randomly selected vector are  $\geq \epsilon$  with a probability at least  $\alpha$ . Further, we consider the compact set of vectors (it is compact with respect to  $L_2$ ):

$$S(\epsilon) = \{y | 1 \geq y_i \geq \epsilon, \sum y_i = 1\}$$

The KL-divergence is defined as:

$$KL(x, y) = \sum_i x_i \log \frac{x_i}{y_i}$$

For any  $y \in S(\epsilon)$ ,  $y_i \geq \epsilon$ . Thus,  $KL(x, y)$  is a continuous function of both arguments on  $S \times S$ . Points outside  $S$  are encountered with probability  $1 - \alpha$ , which can be made arbitrarily small by selecting a sufficiently small  $\epsilon$ .

For the sake of contradiction, we assume that, no matter how small is the query radius, there is a query ball with the center in  $S$  at distance  $r$  from the pivot. In addition, there are points inside query balls that belong to both partitions as well as to  $S$ . This can be seen as an adversarial game, where we select progressively decreasing radii  $r_n \rightarrow 0$ . For each  $r_n$  our adversary finds the query ball with the center  $q_n \in S$  and the radius  $\leq r_n$  such that (1)  $KL(\pi, q_n) = x$  and (2) the query ball intersects both space partitions and  $S$ . To demonstrate the latter, our adversary provides us with points  $u_n^+$  and  $u_n^-$  that lie inside the query ball and belong to different space partitions. Note that  $q_n$ ,  $u_n^+$ , and  $u_n^-$  should all belong to  $S$ .

Formally, there exists a sequence of radii  $r_n \rightarrow 0$ , the sequence of query ball centers  $q_n$ , and sequences of points  $u_n^+$ ,  $u_n^-$  such that:

$$KL(\pi, q_n) = x,$$

$$KL(u_n^+, q_n) \leq r_n \text{ and } KL(u_n^-, q_n) \leq r_n,$$

but

$$KL(\pi, u_n^-) < R \text{ and } KL(\pi, u_n^+) > R. \quad (1)$$

The sequence  $(q_n, u_n^+, u_n^-)$  is defined on a Cartesian product  $S \times S \times S$ , which is compact due to Tychonoff's theorem. Because the Cartesian product is compact, we can assume that  $(q_n, u_n^+, u_n^-)$  is a converging sequence and sequences  $q_n$ ,  $u_n^-$ ,  $u_n^+$  converge as well:<sup>1</sup>

$$(q_n, u_n^-, u_n^+) \rightarrow (q, u^-, u^+) \quad (2)$$

From Eq. 1-2 and continuity of the function  $KL(x, y)$  on  $S \times S$ , we obtain:

$$KL(q, u^+) = KL(q, u^-) = 0, \quad (3)$$

$$KL(\pi, u^+) \geq R, \quad KL(\pi, u^-) \leq R. \quad (4)$$

From properties of the KL-divergence and Eq. 2, it follows that  $u^+ = q = u^-$ . By applying  $u^+ = q = u^-$  to Eq. 4, we get that  $R \leq KL(\pi, q) \leq R$  and, thus, that:

$$KL(\pi, q) = R. \quad (5)$$

Again, from continuity of  $KL(x, y)$ ,  $KL(\pi, q_n) = x$  and  $q_n \rightarrow q$ , we obtain that  $KL(\pi, q) = x$ . Because  $x \neq R$  this conclusion contradicts to Eq. 5.

We obtained a contradiction, which demonstrates that (almost) all sufficiently small query balls at distance  $r \neq R$  from the pivot lie (for the most part) in either the left or the right partition. The exceptions are query balls centered outside  $S$ , or query ball parts that don't belong to  $S$ . Yet, as noted previously, it is possible to select  $S$  such that a probability of drawing a point from  $S$  will be arbitrarily close to 1. This observation finishes the proof of the theorem.  $\square$

### 3 Estimating Decision Function $D_{\pi, R}(x)$ Through Sampling

It is possible to estimate  $D_{\pi, R}(x)$  (defined in Section 2.2 of [3]) through sampling. Note that the resulting search method would not be exact. A straightforward sampling method involves random and independent selection of points  $q_i$  and  $u_i$  from the data set. Two cases are possible depending on whether  $q_i$  and  $u_i$  belong to the same partition. Consider the case when  $q_i$  and  $u_i$  belong to different partitions. This represents the gray ball from Fig. 1. Thus, we learn that there may exist multiple pairs of points (different from  $q_i$ ) within the distance  $r = d(u_i, q_i)$  from  $q_i$  situated in different partitions. Thus, we can be absolutely sure that  $D_{\pi, R}(d(\pi, q_i)) \leq d(u_i, q_i)$ .

<sup>1</sup> If a space  $X$  is compact any sequence contains a converging subsequence with the limit in  $X$ .

In the case when  $u_i$  is in the same partitions as  $q_i$ , we cannot, however, infer that  $D_{\pi,R}(d(\pi, q_i)) > d(u_i, q_i)$ . Indeed, there could exist a nearest-neighbor  $u_j$ , not encountered by the sampling procedure, belonging to a *different* space partition than  $q_i$ , but, nevertheless, satisfying:  $d(u_j, q_j) \leq d(u_i, q_i)$ . If we use  $q_i$  as a query and set  $D_{\pi,R}(d(\pi, q_i))$  to be larger than  $d(u_i, q_i)$ , the partition containing  $u_j$  will be pruned and, consequently,  $u_j$  will not be found.

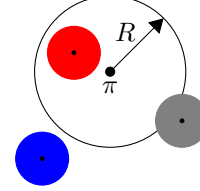

Figure 1: Three types of query balls in the VP-tree. The black circle (centered at the pivot  $\pi$ ) is the sphere that divides the space.

By repeating the sampling procedure multiple times and smoothing results (e.g., by fitting a curve or learning a regression model), we can obtain an estimate for the upper bound of  $D_{\pi,R}(x)$ . There are several problems with this approach. First, due to the concentration of measure,  $d(\pi, q_i)$  is close to  $R$  for most sampled points. Thus,  $D_{\pi,R}(x)$  will be properly estimated only for values  $x \approx R$ . Second, it does not allow us to trade search effectiveness for efficiency.

The underlying principle of an improved sampling method is to divide the  $xy$ -plane, which represents the plot of the function  $D_{\pi,R}(x)$ , into cells. This improved sampling method works as follows:

- We compile the distribution of distances  $d(\pi, q_i)$  (using all data points) and divide it into 50-500 quantiles. These “horizontal” quantiles represent the division of the  $xy$ -plane into vertical bars. Then, several pseudo-queries  $q_i$  are randomly picked from each horizontal quantile.
- For each pseudo-query  $q_i$ ,  $K \approx 100$  pseudo near-neighbors are randomly selected from the data set. We also implemented an approach where  $K$  *true* near-neighbors are obtained by exhaustively searching the data set (an idea proposed by Athitsos et al. [2]). This method is computationally expensive, but it did not result in substantial improvements.
- Now each vertical bar contains a number of pseudo near neighbors. We compute the bar-specific distributions of distances from  $q_i$  to these points and divide each of the distributions into 100-1000 “vertical” quantiles. This step finalizes a division of the  $xy$ -plane into rectangular cells.

To estimate  $D_{\pi,R}(x)$ , we find the vertical bar containing the point  $(x, 0)$ . Then, we start scanning the cells belonging to this bar in the bottom-up fashion. The algorithm keeps two counters. The first counter  $N_{all}$  is a total number of pseudo near neighbors contained in the visited cells. The second counter  $N_{diff}$  is the number neighbors that belong to a different partition than their respective pseudo queries (i.e., the number of situations when we have the gray pseudo query ball, see Fig. 1.). We stop when  $N_{diff}$  becomes larger than  $\gamma N_{all}$  for some threshold value  $\gamma$ . A  $y$ -coordinate corresponding to the last visited cell is used as an estimate for  $D_{\pi,R}(x)$ : One can use the minimum, the maximum, or any intermediate  $y$ -coordinate of points inside the last visited cell. The threshold  $\gamma$  is selected empirically. In that, highest recall values (and slowest speeds) are obtained for  $\gamma = 0$ . Unlike previous efforts, see e.g. [1], our sampling algorithm estimates  $D_{\pi,R}(x)$  for every pivot  $\pi$  (rather than one global distribution) and, thus, it may better adapt to specifics of data partitions induced by pivots.

## References

- [1] G. Amato, F. Rabitti, P. Savino, and P. Zezula. Region proximity in metric spaces and its use for approximate similarity search. *ACM Trans. Inf. Syst.*, 21(2):192–227, Apr. 2003.
- [2] V. Athitsos, J. Alon, S. Sclaroff, and G. Kollios. BoostMap: A method for efficient approximate similarity rankings. In *Computer Vision and Pattern Recognition, 2004. CVPR 2004. Proceedings of the 2004 IEEE Computer Society Conference on*, volume 2, pages II–268 – II–275 Vol.2, june-2 july 2004.
- [3] L. Boytsov and B. Naidan. Learning to prune in metric and non-metric spaces. In *Advances in Neural Information Processing Systems*, 2013.
